# Supplementary material for: Susceptibility of Four Abalone Species, Haliotis gigantea, Haliotis discus discus, Haliotis discus hannai and Haliotis diversicolor, to Abalone asfa-like Virus
Source: MDPI journal article supplement (doi:10.3390/v13112315), 2021-11-20
Supplement: s1 [file s1]

Supplementary Materials

# **Susceptibility of Four Abalone Species, *Haliotis gigantea*, *Haliotis discus discus*, *Haliotis discus hannai* and *Haliotis diversicolor*, to Abalone asfa-like Virus**

Table S1. Cloning primers.

| Primer Name | Forward Primer (5'–3') *               | Primer Name | Reverse Primer (5'–3') *                |
|-------------|----------------------------------------|-------------|-----------------------------------------|
| MCP-F       | gagggatccgaattcATGGCGGCAGGAG-GACCCTTC  | MCP-R       | ttaagcagagattacTTATGCAGCATATCGCAAGA-TAG |
| PRV-F       | gagggatccgaattcATGTACAGAT-TTACCCAGGAAG | PRV-R       | ttaagcagagattacTTAGAGTATGATTGG-GAAGTCC  |

\*: Lower case letters indicate In-Fusion cloning sequence. Upper case letters indicate gene-specific sequence.

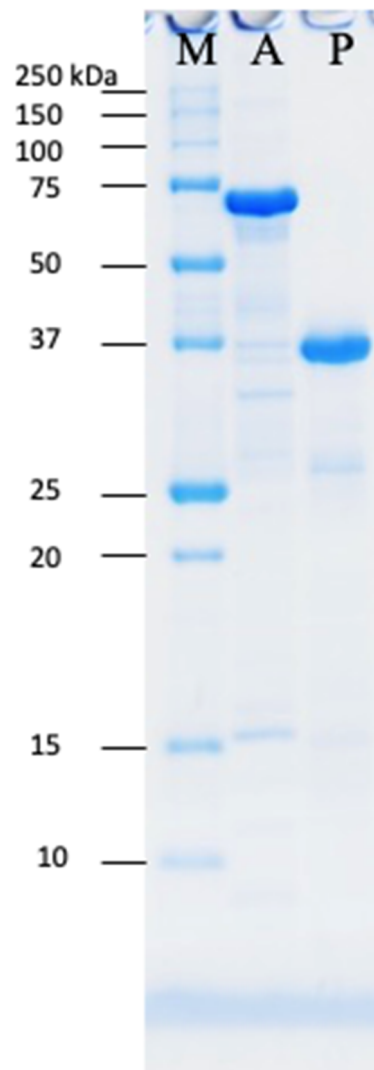

**Figure S1.** Electrophoretic image of purified His-tagged recombinant protein. M: molecular marker, A: AbALV MCP, P: PRV-2  $\sigma$ 1.
